# Supplementary material for: Restoring a Butterfly Hot Spot by Large Ungulates Refaunation: The Case of the Milovice Military Training Range, Czech Republic
Source: Research Square preprint supplement (doi:10.21203/rs.3.rs-122442/v1), 2020-12-11
Supplement: Supplementary file 2 [file b6a1d7b017afa5a530001da2.xlsx]

## Sheet: List1
Ordination model /	~refaunation +tanks			~refaunation +tanks | factorial year +locality			~ungulates +tanks			~ungulates +tanks | factorial year +locality
Trait name	Explains %	pseudo-F	P	Explains %	pseudo-F	P	Explains %	pseudo-F	P	Explains %	pseudo-F	P
LIFE HISTORY TRAITS
Wing span	2.7	1.6	0.178	3	1.8	0.141	2.6	1.6	0.161	2.9	1.8	0.131
Host plant form	4.1	2.5	0.07	4.9	3	0.03	3.5	2.2	0.09	3.4	2.1	0.095
Voltinism	1.8	1.1	0.368	2.9	1.8	0.157	1.8	1.1	0.343	2.5	1.5	0.192
Fertility	1.2	0.7	0.535	0.4	0.2	0.868	1.9	1.1	0.352	2.3	1.4	0.239
Mobility	0.3	0.2	0.928	<0.1	<0.1	0.986	0.4	0.3	0.9	0.6	0.3	0.851
Density	2.4	1.4	0.245	2.3	1.4	0.249	2.5	1.5	0.207	1.7	1	0.393
Flight period length	0.5	0.3	0.833	0.7	0.4	0.713	0.2	0.1	0.974	1.1	0.7	0.629
Overwintering stage	0.4	0.2	0.855	1.2	0.7	0.513	1.2	0.7	0.551	1.2	0.7	0.567
Diet breadth	3.4	2.1	0.142	2.9	1.8	0.186	3.3	2	0.128	2.1	1.2	0.292
CLIMATIC NICHE TRAITS
Annual temperature	2	1.2	0.313	1.9	1.1	0.333	1.7	1	0.382	1.1	0.7	0.6
Annual temperature niche breadth [NB]	0.3	0.2	0.914	1.2	0.7	0.582	0.6	0.3	0.853	0.9	0.5	0.726
Ceninentality	1.4	0.8	0.465	2.5	1.5	0.222	1.9	1.1	0.34	0.7	0.4	0.79					P
Continentality NB	1.1	0.6	0.626	1	0.6	0.621	0.7	0.4	0.818	2	1.2	0.293
Precipitation	<0.1	<0.1	0.981	0.8	0.5	0.683	1.6	0.9	0.418	0.7	0.4	0.764
Precipitation NB	0.6	0.3	0.803	1	0.6	0.621	1	0.6	0.705	0.7	0.4	0.775
Oceanity	0.5	0.3	0.809	1.1	0.7	0.58	0.6	0.4	0.834	0.9	0.5	0.719
Oceanity NB	0.6	0.3	0.811	1.8	1.1	0.363	0.6	0.3	0.85	1.4	0.9	0.498
Winter GDD	1.5	0.9	0.403	2.7	1.6	0.177	1.5	0.9	0.439	2	1.2	0.304
Winter GDD NB	1	0.6	0.652	2.5	1.5	0.242	1	0.6	0.717	1.9	1.1	0.357
Spring GDD	1.8	1.1	0.371	2.4	1.4	0.246	1.7	1	0.369	1.5	0.9	0.463
Spring GDD NB	1	0.6	0.683	2.3	1.4	0.25	0.9	0.5	0.73	1.6	0.9	0.434
Early summer GDD	1.9	1.2	0.335	1.9	1.2	0.316	1.7	1	0.374	1.1	0.7	0.603
Early summer GDD NB	0.8	0.5	0.727	2.1	1.3	0.275	0.9	0.5	0.722	1.7	1	0.397
Summer GDD	2	1.2	0.317	1.8	1.1	0.332	1.7	1	0.423	1.1	0.6	0.634
Summer GDD NB	0.7	0.4	0.752	1.9	1.2	0.349	0.9	0.6	0.727	1.9	1.1	0.356
Water availability	0.7	0.4	0.715	1.1	0.6	0.588	1.2	0.7	0.546	0.6	0.4	0.82
Water availability NB	1.2	0.7	0.569	2.2	1.3	0.272	2	1.2	0.327	2.2	1.3	0.243
CONSERVATION RELATED ATTRIBUTES
Present CZ distribution	1.6	1	0.44	1.6	0.9	0.417	1.3	0.8	0.56	2	1.2	0.298
Past CZ distribution	2.3	1.4	0.241	2.7	1.7	0.168	2.7	1.6	0.165	1.2	0.7	0.579
CZ distribution trend	0.7	0.4	0.767	0.3	0.2	0.883	0.4	0.2	0.925	0.4	0.2	0.907
European range size	1.3	0.8	0.506	1.9	1.2	0.358	1.6	0.9	0.444	<0.1	<0.1	0.999
Global range size	1.6	0.9	0.42	0.2	0.1	0.936	1.8	1.1	0.357	1.6	0.9	0.446
CZ Red list status	0.8	0.5	0.629	0.5	0.3	0.747	0.5	0.3	0.786	0.4	0.3	0.848
